# Supplementary material
Source: publisher figshare collection journal article supplement (https://sage.figshare.com/ndownloader/files/23391839)
Supplement: Supplementary file 1 [file 23391839]

## Supplementary S

**Table S.1: Main Interviews Topics**

|                                                                                                                                                                                                                                  |
|----------------------------------------------------------------------------------------------------------------------------------------------------------------------------------------------------------------------------------|
| Respondent's background                                                                                                                                                                                                          |
| <ul style="list-style-type: none"><li>• Time at practice and involvement in PCMH</li><li>• Knowledge of patient experience survey</li></ul>                                                                                      |
| Practice history of PCMH-recognition                                                                                                                                                                                             |
| <ul style="list-style-type: none"><li>• PCMH-recognition history</li><li>• Motivation for pursuing PCMH</li><li>• Resources or supports provided from network/organization for PCMH changes</li></ul>                            |
| Patient experience survey data                                                                                                                                                                                                   |
| <ul style="list-style-type: none"><li>• Type of patient experience survey (including CAHPS and CAHPS PCMH)</li><li>• Duration and use of patient experience survey</li><li>• Experience using CAHPS PCMH survey</li></ul>        |
| Use of patient experience data during PCMH transformation                                                                                                                                                                        |
| <ul style="list-style-type: none"><li>• How patient experience survey results were used to make PCMH changes</li><li>• Monitoring and data dissemination processes for patient experience surveys</li></ul>                      |
| Patient experience distinction from NCQA                                                                                                                                                                                         |
| <ul style="list-style-type: none"><li>• Experience and plans for Patient Experience Distinction</li></ul>                                                                                                                        |
| Trends in patient experience                                                                                                                                                                                                     |
| <ul style="list-style-type: none"><li>• Trends in patient experience and targeted areas of improvement</li><li>• Public reporting and pay for performance experience</li></ul>                                                   |
| Details of PCMH transformation changes                                                                                                                                                                                           |
| <ul style="list-style-type: none"><li>• Major achievements of PCMH change</li><li>• Changes in provision of care and services based on PCMH standards</li><li>• Use and integration of electronic medical record (EMR)</li></ul> |
